# Supplementary material
Source: PubMed Central journal article supplement (PMC7721947)

Data Path : F:\dr.kiani\chromatograms\16.2.98\  
Data File : 701.D  
Acq On : 6 May 2019 13:35  
Operator :  
Sample : 701  
Misc :  
ALS Vial : 1 Sample Multiplier: 1

Search Libraries: C:\Database\wiley7n.1 Minimum Quality: 0  
C:\Database\NIST05a.L Minimum Quality: 0  
C:\Database\Pest.1

Unknown Spectrum: Apex  
Integration Events: RTE Integrator - rteint.p

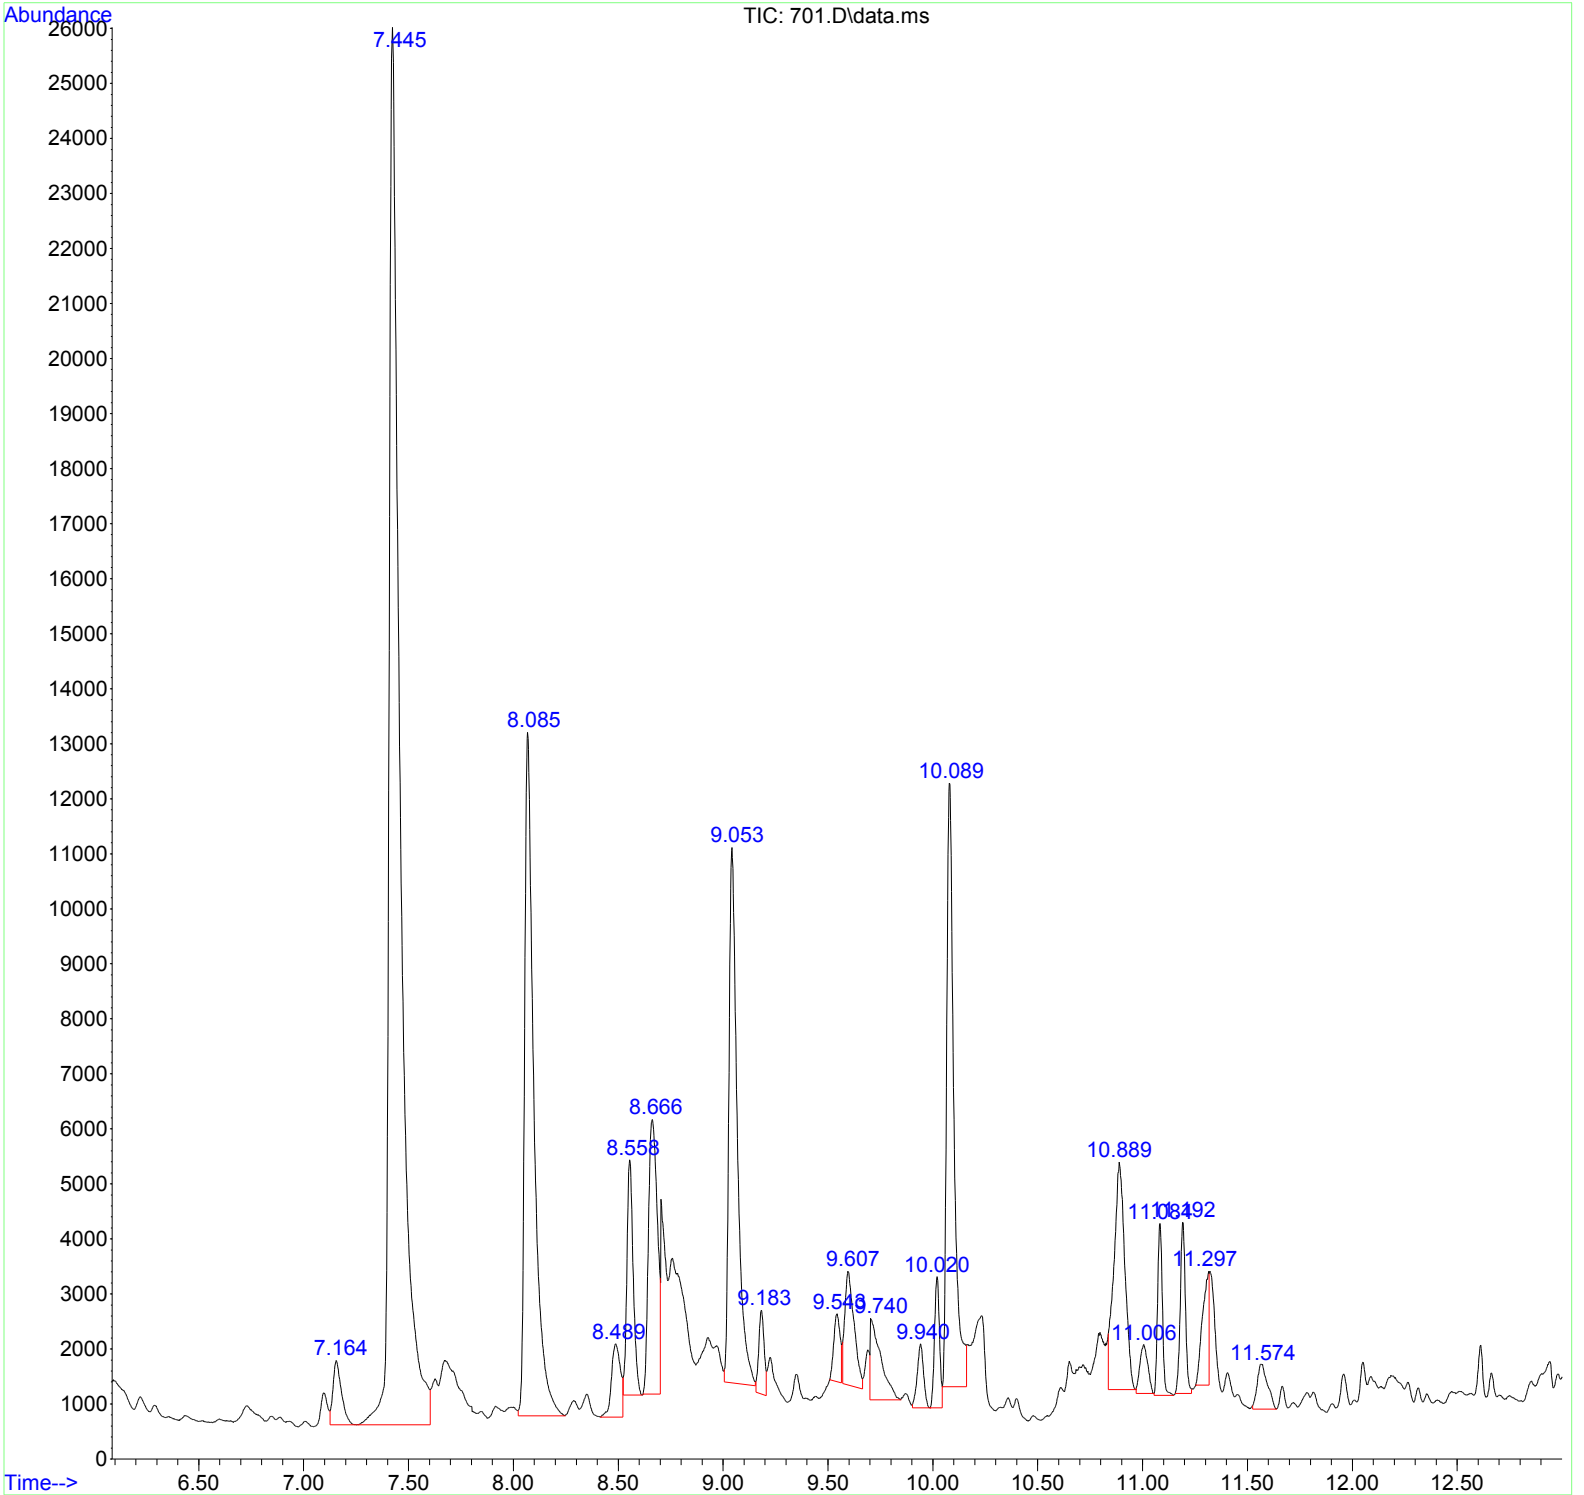

Supplement: 40201_2020_540_MOESM2_ESM.pdf [file 40201_2020_540_MOESM2_ESM.pdf]
