# Supplementary material
Source: PubMed Central journal article supplement (PMC7721947)

Library Search Report

Data Path : F:\dr.kiani\chromatograms\24.4.97\  
Data File : NEW-0.01PPB.D  
Acq On : 15 Jul 2018 19:14  
Operator :  
Sample : new-0.01ppb  
Misc :  
ALS Vial : 1 Sample Multiplier: 1

Search Libraries: C:\Database\wiley7n.1 Minimum Quality: 0  
C:\Database\NIST05a.L Minimum Quality: 0  
C:\Database\Pest.1

Unknown Spectrum: Apex  
Integration Events: RTE Integrator - rteint.p

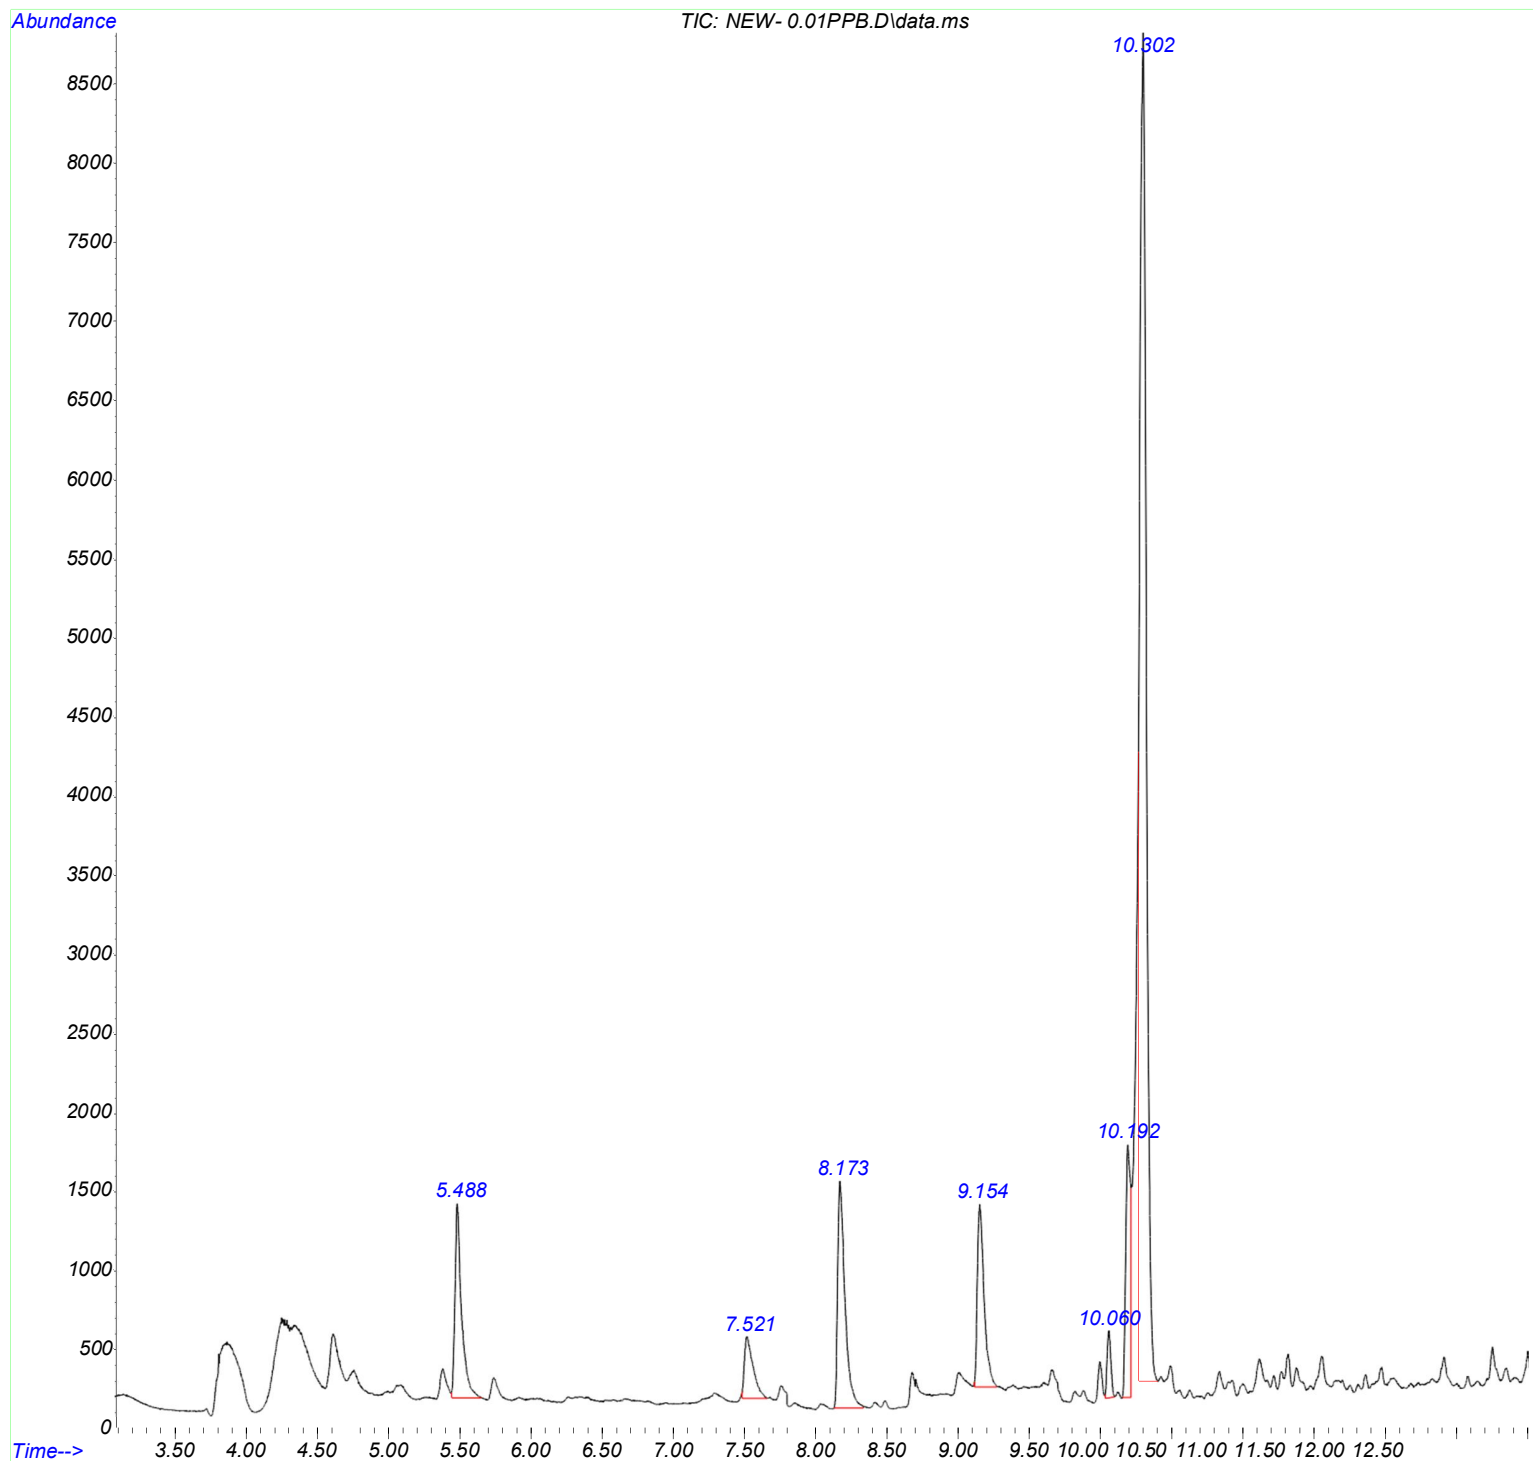

Supplement: 40201_2020_540_MOESM3_ESM.pdf [file 40201_2020_540_MOESM3_ESM.pdf]
